# Supplementary material
Source: ML conference proceedings conference paper supplement (https://openaccess.thecvf.com/content/ICCV2025/html/Dong_VPR-Cloak_A_First_ICCV_2025_paper.html)
Supplement: Supplementary file 1 [file Dong_VPR-Cloak_A_First_ICCV_2025_supplemental.pdf]

# VPR-Cloak: A First Look at Privacy Cloak Against Visual Place Recognition

## Supplementary Material

Shuting Dong<sup>1,2\*</sup>, Mingzhi Chen<sup>3\*</sup>, Feng Lu<sup>1,2</sup>, Hao Yu<sup>1</sup>,  
Guanghao Li<sup>1,3</sup>, Zhe Wu<sup>2</sup>, Ming Tang<sup>3†</sup>, Chun Yuan<sup>1†</sup>

<sup>1</sup>Tsinghua University, <sup>2</sup>Pengcheng Laboratory, <sup>3</sup>Southern University of Science and Technology

dst21@mails.tsinghua.edu.cn, 12211414@mail.sustech.edu.cn,

lf22@mails.tsinghua.edu.cn, longinyh@gmail.com, ligh24@mails.tsinghua.edu.cn,

wuzh02@pcl.ac.cn, tangm3@sustech.edu.cn, yuanc@sz.tsinghua.edu.cn

### 1. Additional Comparisons

**Enhanced Visual Fidelity and Imperceptibility** Table 1 highlights the superior image quality of our method compared to existing approaches. On PITTS30K-Sela, our method achieves the lowest LPIPS (0.041) and highest PSNR (33.67 dB). The integration of frequency-domain optimization ensures that perturbations primarily refine high-frequency components, preserving low-frequency structural information vital for human perception.

**Superior Protection Effectiveness Against Black-Box and White-Box VPR Models.** As shown in Table 2, our method consistently achieves the highest reduction in retrieval accuracy ( $\Delta R@1$ ,  $\Delta R@5$ ,  $\Delta R@10$ ) across multiple datasets and VPR models. For instance, on the PITTS30K-Crica setup, our method outperforms ANDA and MULTI-ANDA by 15.6% and 11.7% in  $\Delta R@1$ , respectively, while achieving a significant 22.9% improvement in  $\Delta R@5$ . Similarly, on the NORDLAND-Sela setup, our method attains an unprecedented  $\Delta R@1$  of 86.5%, surpassing MULTI-ANDA by 34.3%. These results validate the robustness of our method, which strategically concentrates perturbations on decisive regions critical for place recognition, thereby maximizing disruption to unauthorized VPR models.

Notably, in challenging scenarios such as MSLS CHALLENGE-Crica, our method achieves  $\Delta R@1 = 73.2\%$ , outperforming MULTI-ANDA by 6.0%, while maintaining high performance even under severe environmental variations (e.g., seasonal changes in NORDLAND). This demonstrates the transferability of our perturbations across diverse black-box models, attributed to the dynamic selection of surrogate VPR models during optimization.

Table 1. Image quality comparison (Epsilon=8/255).

| Dataset   | Method      | LPIPS        | PSNR         | SSIM         | Avg Epsilon |
|-----------|-------------|--------------|--------------|--------------|-------------|
| PITTS30K  | ANDA        | 0.107        | 30.99        | 0.893        | 3.56        |
|           | MULTI-ANDA  | 0.098        | 31.18        | 0.901        | 3.10        |
|           | Our (Crica) | 0.057        | 32.41        | 0.928        | <b>2.84</b> |
|           | Our (Sela)  | <b>0.041</b> | <b>33.67</b> | <b>0.941</b> | 2.88        |
| TOKYO247  | ANDA        | 0.057        | <b>32.27</b> | 0.912        | 3.92        |
|           | MULTI-ANDA  | <b>0.054</b> | 32.18        | <b>0.920</b> | <b>3.42</b> |
|           | Our (Crica) | 0.059        | 30.27        | 0.914        | 3.64        |
|           | Our (Sela)  | 0.071        | 29.89        | 0.909        | 3.60        |
| MSLS      | ANDA        | 0.094        | 32.13        | 0.901        | 3.24        |
|           | MULTI-ANDA  | 0.088        | 31.58        | 0.909        | 2.88        |
|           | Our (Crica) | <b>0.066</b> | <b>32.21</b> | <b>0.916</b> | 2.82        |
|           | Our (Sela)  | 0.070        | 32.19        | 0.911        | <b>2.78</b> |
| CHALLENGE | ANDA        | 0.092        | 33.99        | 0.931        | 3.54        |
|           | MULTI-ANDA  | 0.073        | 34.20        | 0.936        | 2.76        |
|           | Our (Crica) | 0.062        | <b>35.99</b> | <b>0.942</b> | 2.88        |
|           | Our (Sela)  | <b>0.051</b> | 34.25        | 0.931        | <b>2.48</b> |
| NORDLAND  | ANDA        | 0.087        | 31.58        | 0.902        | 2.42        |
|           | MULTI-ANDA  | 0.072        | 32.03        | <b>0.917</b> | 1.92        |
|           | Our (Crica) | <b>0.071</b> | <b>32.13</b> | 0.915        | <b>1.84</b> |
|           | Our (Sela)  | 0.084        | 31.90        | 0.909        | 2.20        |

### 2. Additional Protection Performance on Commercial APIs

Figs. 1–3 visually demonstrate the effectiveness of our proposed method when tested on commercial APIs, including Google and Microsoft Bing. These commercial systems are designed to accurately identify and match locations based on visual cues extracted from images. However, after applying our method, the ability of these APIs to retrieve and recognize locations is significantly disrupted. The modified images effectively prevent the systems from extracting meaningful location-related features, rendering them unidentifiable.

\*These authors contributed equally to this work.

†Corresponding authors.

Table 2. Protection success rate (%) comparisons (Epsilon=8/255).  $\Delta R@1$ ,  $\Delta R@5$  and  $\Delta R@10$  measure the reduction in the model’s retrieval accuracy after applying protection, with larger values indicating stronger protection.

| Dataset        | Model     | ANDA         |              |               | MULTI-ANDA   |              |               | Our (Crica)  |              |               | Our (Sela)   |              |               |
|----------------|-----------|--------------|--------------|---------------|--------------|--------------|---------------|--------------|--------------|---------------|--------------|--------------|---------------|
|                |           | $\Delta R@1$ | $\Delta R@5$ | $\Delta R@10$ | $\Delta R@1$ | $\Delta R@5$ | $\Delta R@10$ | $\Delta R@1$ | $\Delta R@5$ | $\Delta R@10$ | $\Delta R@1$ | $\Delta R@5$ | $\Delta R@10$ |
| PITTS30K       | Crica     | 41.5         | 25.5         | 14.6          | 45.4         | 27.1         | 16.9          | <b>57.1</b>  | <b>47.7</b>  | <b>37.5</b>   | 40.2         | 30.7         | 26.1          |
|                | DHE       | 15.2         | 6.5          | 1.9           | 29.2         | 18.2         | 10.6          | 35.5         | 20.3         | 14.4          | <b>39.2</b>  | <b>23.3</b>  | <b>16.1</b>   |
|                | Salad     | 16.5         | 9.2          | 4.0           | 23.6         | 12.3         | 8.7           | 33.4         | 19.3         | 12.2          | <b>37.5</b>  | <b>23.1</b>  | <b>17.9</b>   |
|                | Sela      | 14.7         | 10.6         | 3.3           | 15.9         | 12.2         | 4.5           | 30.3         | 19.6         | 16.2          | <b>62.3</b>  | <b>46.0</b>  | <b>33.5</b>   |
|                | VLAD-BuFF | 14.0         | 8.5          | -             | 16.4         | 10.6         | -             | <b>31.0</b>  | <b>19.8</b>  | -             | 28.4         | 18.6         | -             |
| TOKYO247       | Crica     | 42.1         | 28.6         | 18.0          | 43.2         | 30.2         | 23.2          | <b>57.6</b>  | <b>55.7</b>  | <b>48.0</b>   | 44.2         | 27.9         | 22.8          |
|                | DHE       | 15.4         | 17.9         | 11.4          | 32.0         | 34.7         | 25.5          | <b>41.3</b>  | <b>45.4</b>  | <b>44.1</b>   | 35.9         | 40.2         | 39.9          |
|                | Sela      | 30.3         | 22.7         | 12.3          | 33.0         | 24.4         | 9.5           | 41.3         | 30.5         | 20.4          | <b>54.9</b>  | <b>51.3</b>  | <b>46.2</b>   |
|                | VLAD-BuFF | 14.8         | 5.8          | -             | 17.9         | 9.9          | -             | 24.8         | 18.8         | -             | <b>27.3</b>  | <b>21.7</b>  | -             |
| MSLS           | Crica     | 51.8         | 44.1         | 25.4          | 53.2         | 45.3         | 25.5          | <b>78.1</b>  | <b>65.8</b>  | <b>43.7</b>   | 38.0         | 27.5         | 24.1          |
|                | DHE       | 30.9         | 22.4         | 15.7          | 42.8         | 29.0         | 24.1          | <b>46.4</b>  | <b>32.9</b>  | <b>27.2</b>   | 44.9         | 32.3         | 26.4          |
|                | Salad     | 31.0         | 23.1         | 14.4          | 36.1         | 30.1         | 17.8          | <b>49.4</b>  | <b>37.0</b>  | <b>25.3</b>   | 45.3         | 34.1         | 22.8          |
|                | Sela      | 15.9         | 9.2          | 4.1           | 21.7         | 12.7         | 5.3           | 38.8         | 28.7         | 24.6          | <b>70.4</b>  | <b>64.2</b>  | <b>45.8</b>   |
|                | VLAD-BuFF | 22.6         | 12.9         | -             | 23.3         | 14.5         | -             | <b>39.0</b>  | <b>26.6</b>  | -             | 35.5         | 24.4         | -             |
| MSLS CHALLENGE | Crica     | 66.9         | 74.5         | 64.0          | 67.2         | 74.9         | 66.4          | 68.6         | 76.3         | 75.4          | <b>73.2</b>  | <b>87.0</b>  | <b>89.4</b>   |
|                | DHE       | 58.9         | 74.3         | 75.8          | 61.3         | 77.4         | <b>81.5</b>   | <b>61.5</b>  | <b>77.6</b>  | <b>81.5</b>   | 61.1         | 76.4         | 78.7          |
|                | Salad     | 71.4         | 82.9         | 81.2          | 73.9         | 87.2         | 86.5          | 74.2         | 87.6         | 89.4          | <b>74.6</b>  | <b>87.9</b>  | <b>90.2</b>   |
|                | Sela      | 71.9         | 82.7         | 77.3          | 72.9         | 83.6         | 80.5          | <b>73.3</b>  | <b>86.9</b>  | <b>89.5</b>   | 68.1         | 75.9         | 74.3          |
| NORDLAND       | Crica     | 57.8         | 52.1         | 40.4          | 59.3         | 55.6         | 46.9          | <b>84.6</b>  | <b>75.6</b>  | 59.0          | 60.9         | 67.2         | <b>66.2</b>   |
|                | DHE       | 35.5         | 30.2         | 29.1          | 50.7         | 63.6         | 62.0          | 63.5         | <b>76.4</b>  | <b>76.1</b>   | <b>63.6</b>  | 74.2         | 68.6          |
|                | Salad     | 48.2         | 49.8         | 40.3          | 61.9         | 64.9         | 52.4          | <b>69.3</b>  | <b>78.0</b>  | <b>74.4</b>   | 66.2         | 75.8         | 70.4          |
|                | Sela      | 48.0         | 49.9         | 40.7          | 52.2         | 55.8         | 47.9          | 61.8         | 68.3         | 68.4          | <b>86.5</b>  | <b>80.5</b>  | <b>60.2</b>   |
|                | VLAD-BuFF | 55.8         | 55.8         | -             | 58.4         | 63.3         | -             | <b>66.2</b>  | <b>70.6</b>  | -             | 64.6         | 67.8         | -             |

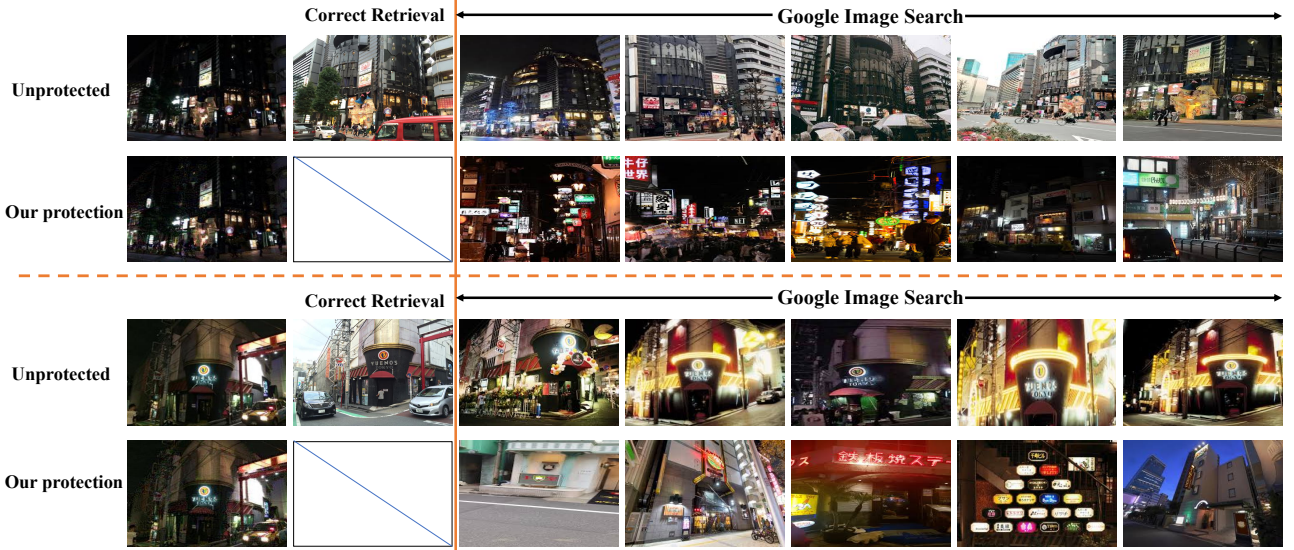

Figure 1. Protection on Commercial APIs. Our method successfully prevents **Google** and **Microsoft Bing** from retrieving location information while ensuring imperceptible modifications, highlighting our method’s practical superiority.

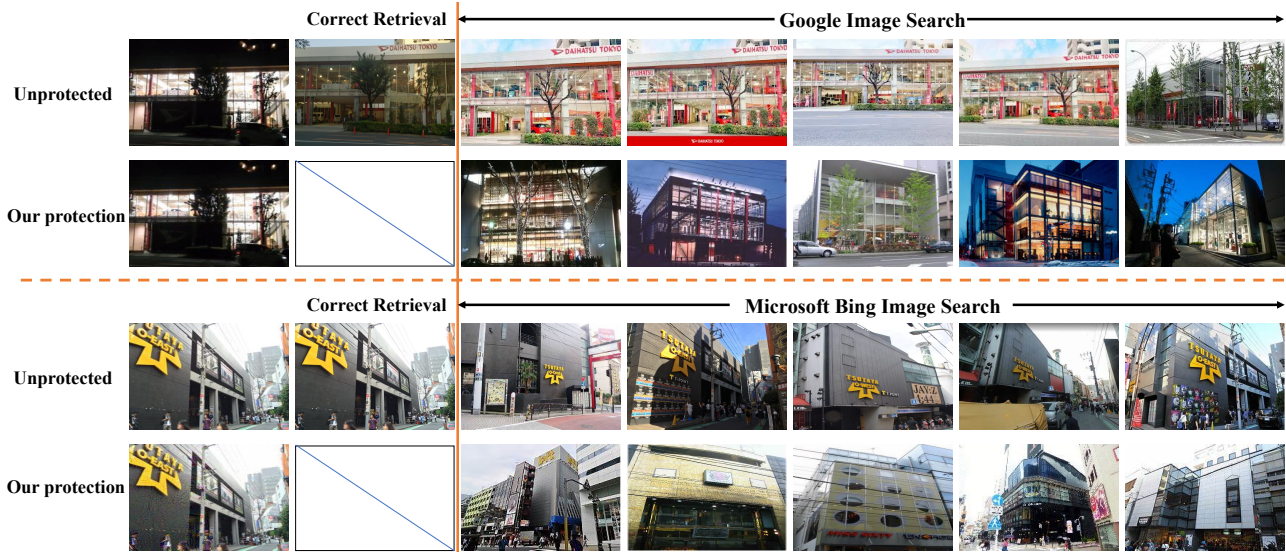

Figure 2. Protection on Commercial APIs. Our method successfully prevents **Google and Microsoft Bing** from retrieving location information while ensuring imperceptible modifications, highlighting our method’s practical superiority.

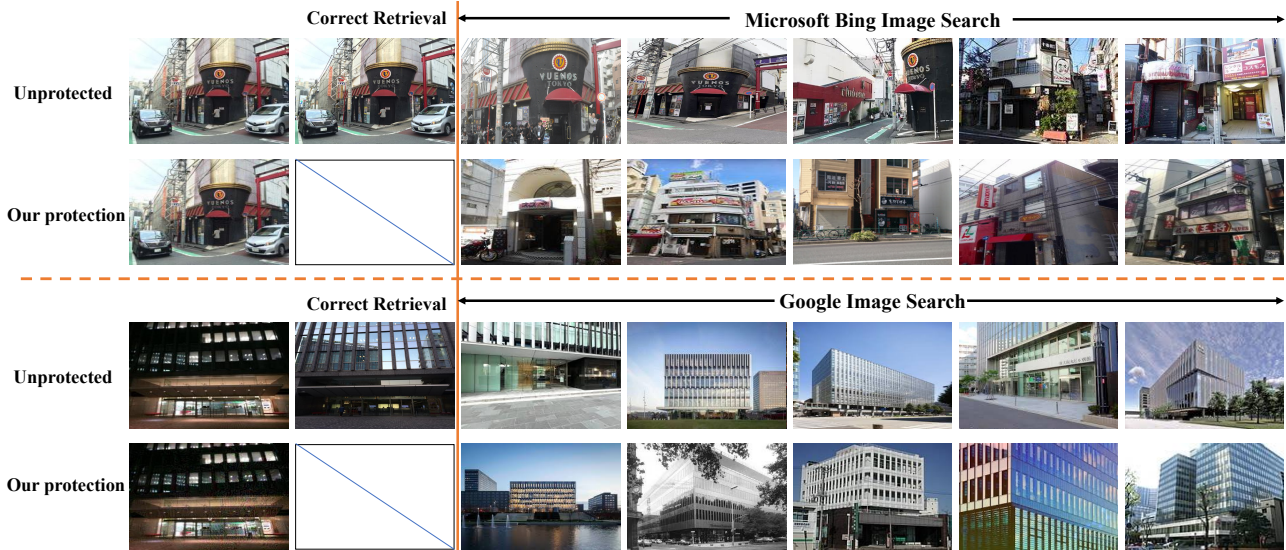

Figure 3. Protection on Commercial APIs. Our method successfully prevents **Google and Microsoft Bing** from retrieving location information while ensuring imperceptible modifications, highlighting our method’s practical superiority.
